# Supplementary material for: Development and optimization of a Defined Serum-Free Medium for Muscle satellite cells towards sustainable meat cultivation
Source: Research Square preprint supplement (doi:10.21203/rs.3.rs-7009996/v1), 2025-09-02
Supplement: Supplementary file 1 [file d7b34735097d7362c223e954.docx]

Supplementary Materials

Supplementary Table 1. BBD experimental design for three factors with the experimental absorbance responses.

| Runs | Factors |  |  | Absorbance |
| --- | --- | --- | --- | --- |
|  | A:BSA(mg/ml) | B:Insulin(μg/ml) | C:Fetuin(mg/ml) | Experimental |
| 1 | 1 | 5 | 1.25 | 0.4236 |
| 2 | 10 | 5 | 1.25 | 0.4332 |
| 3 | 1 | 50 | 1.25 | 0.4097 |
| 4 | 10 | 50 | 1.25 | 0.4367 |
| 5 | 1 | 27.5 | 0.5 | 0.4375 |
| 6 | 10 | 27.5 | 0.5 | 0.4554 |
| 7 | 1 | 27.5 | 2 | 0.4575 |
| 8 | 10 | 27.5 | 2 | 0.4636 |
| 9 | 5.5 | 5 | 0.5 | 0.4671 |
| 10 | 5.5 | 50 | 0.5 | 0.4536 |
| 11 | 5.5 | 5 | 2 | 0.4703 |
| 12 | 5.5 | 50 | 2 | 0.4526 |
| 13 | 5.5 | 27.5 | 1.25 | 0.5196 |
| 14 | 5.5 | 27.5 | 1.25 | 0.5046 |
| 15 | 5.5 | 27.5 | 1.25 | 0.497 |
| 16 | 5.5 | 27.5 | 1.25 | 0.5052 |
| 17 | 5.5 | 27.5 | 1.25 | 0.4965 |

Supplementary Table 2. BBD experimental design for three factors with the experimental absorbance responses.

| Runs | Factors |  |  | Absorbance |
| --- | --- | --- | --- | --- |
|  | A:bFGF(ng/ml) | B: PDGF (ng/ml) | C: PTN (ng/ml) | Experimental |
| 1 | 10 | 20 | 1250 | 0.8035 |
| 2 | 50 | 20 | 1250 | 0.801967 |
| 3 | 10 | 80 | 1250 | 0.8277 |
| 4 | 50 | 80 | 1250 | 0.811633 |
| 5 | 10 | 50 | 500 | 0.8816 |
| 6 | 50 | 50 | 500 | 0.876033 |
| 7 | 10 | 50 | 2000 | 0.923133 |
| 8 | 50 | 50 | 2000 | 0.907867 |
| 9 | 30 | 20 | 500 | 0.829833 |
| 10 | 30 | 80 | 500 | 0.832133 |
| 11 | 30 | 20 | 2000 | 0.845933 |
| 12 | 30 | 80 | 2000 | 0.869133 |
| 13 | 30 | 50 | 1250 | 1.04033 |
| 14 | 30 | 50 | 1250 | 1.0789 |
| 15 | 30 | 50 | 1250 | 1.0326 |


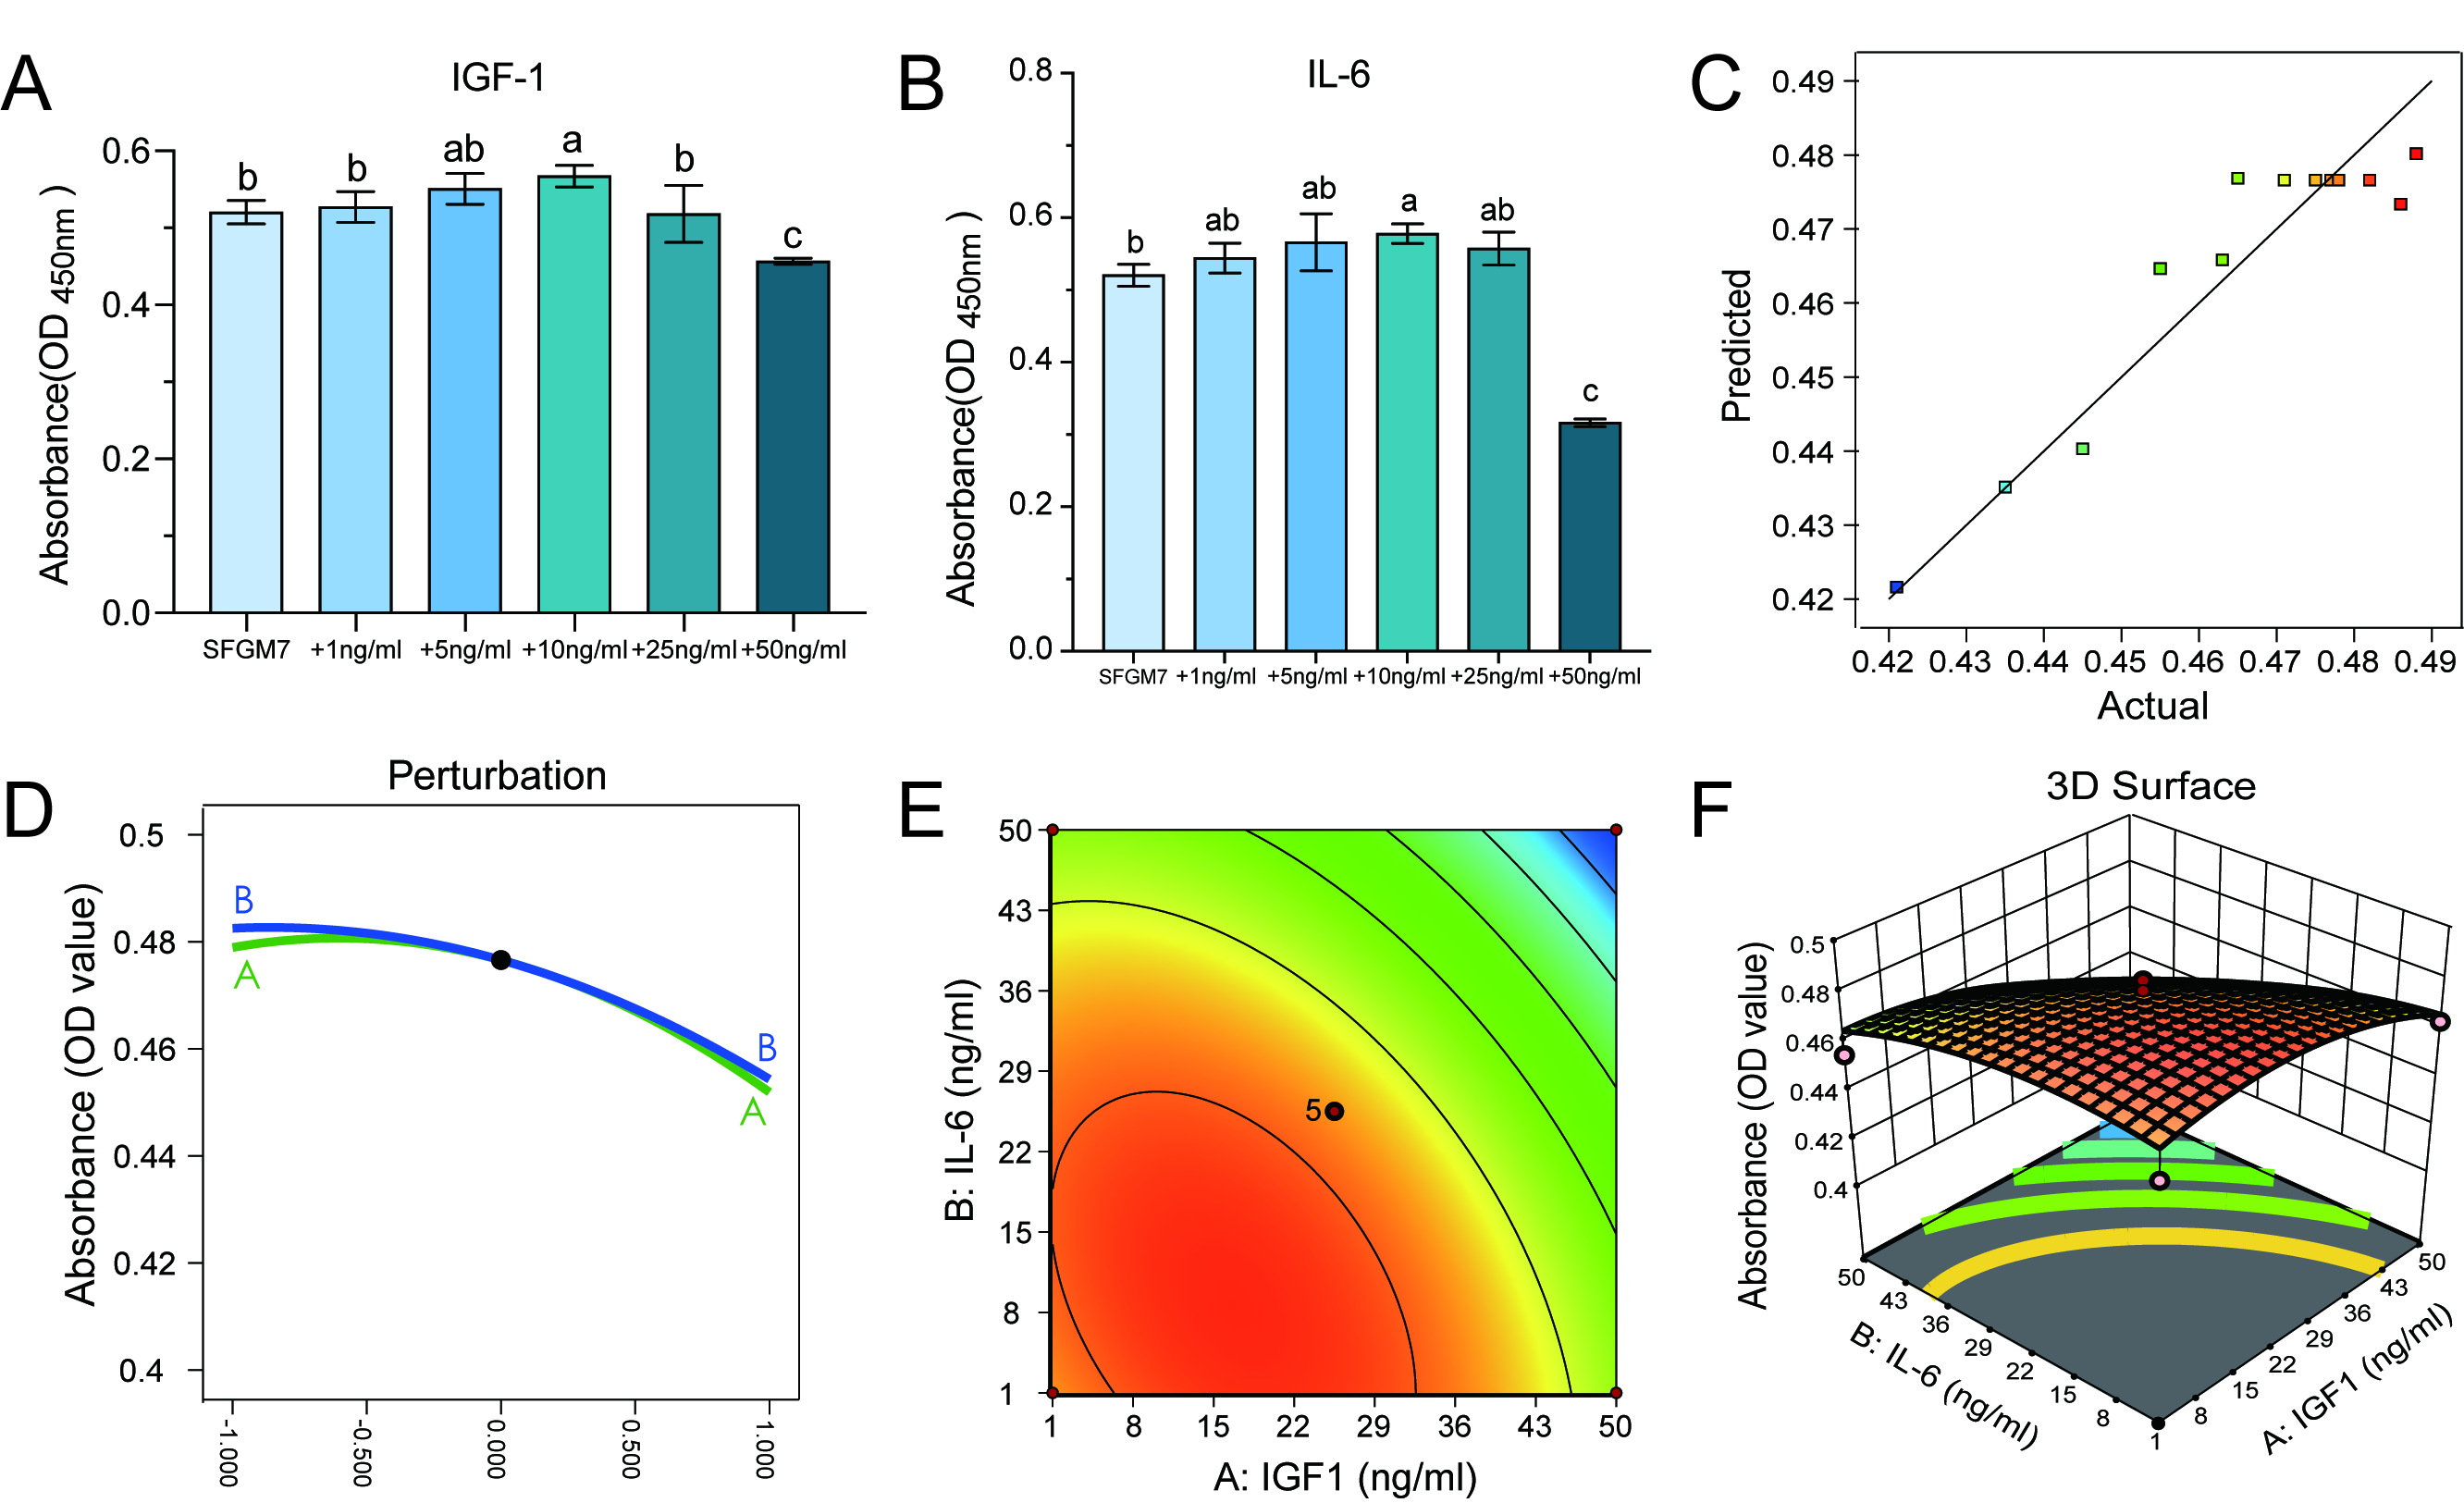


**Supplementary Figure1.** Optimization of IGF-1 and IL-6 concentrations A: Effective concentration ranges of individual components IGF-1. B: Effective concentration ranges of individual components IL-6. C: BBD model with tested parameters (Predicted vs. Actual values). D: BBD model with tested parameters (Perturbation analysis). E: Contour plots illustrating the interactions among (A) IGF-1 and (B) IL-6 F: 3D surface plot demonstrating the interactive effects of varying concentrations of IGF-1 and IL-6.
